# Supplementary material for: Sustainable Composite Materials Based on Carnauba Wax and Montmorillonite Nanoclay for Energy Storage
Source: MDPI journal article supplement (doi:10.3390/ma17091978), 2024-04-24
Supplement: s1 [file s1]

Supporting Information for

**Sustainable Composite Materials based on Carnauba Wax and Montmorillonite Nanoclay**

**for Energy Storage**

Serhii Brychka<sup>a,b,c\*</sup>, Alla Brychka<sup>a,b,d</sup>, Niklas Hedin<sup>b</sup>, Mihail Mondeshki<sup>a\*</sup>

<sup>a</sup>*Department Chemie, Johannes-Gutenberg-Universität, Duesbergweg 10-14, 55128 Mainz, Germany*

<sup>b</sup>*Department of Materials and Environmental Chemistry, Stockholm University, SE-106 91 Stockholm, Sweden*

<sup>c</sup>*The Gas Institute of the National Academy of Sciences of Ukraine, 39, Dehtyarivska Str., 03113 Kyiv, Ukraine*

<sup>d</sup>*Chuiko Institute of Surface Chemistry of National Academy of Sciences, 17 General Naumov Street, Kyiv 03164, Ukraine*

\* e-mail: [serg\\_1971@ukr.net](mailto:serg_1971@ukr.net); [mondeshk@uni-mainz.de](mailto:mondeshk@uni-mainz.de)

### XRD spectra

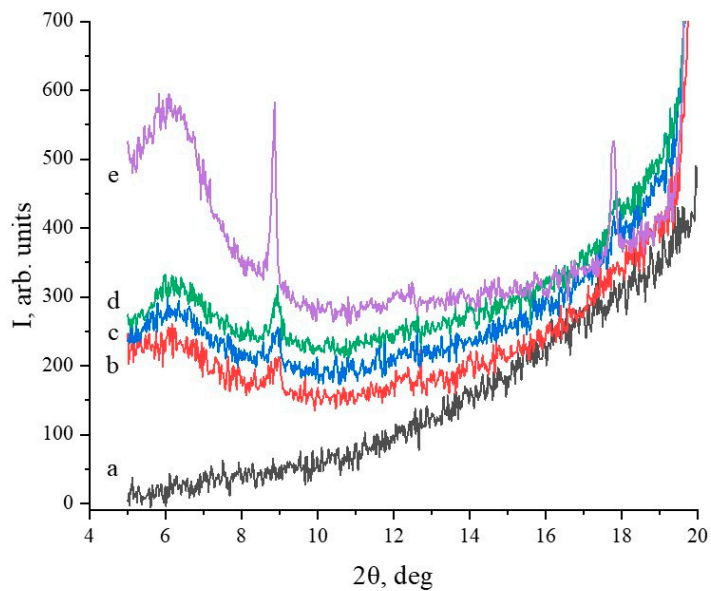

Figure S1. XRD patterns of mixtures of wax (a) with montmorillonite clay (w/w): (b) MCS<sub>70:30</sub>, (c) MCS<sub>60:40</sub>, (d) MCS<sub>50:50</sub>, and the pure montmorillonite clay (e).

The diffraction peak at  $2\theta = 26.64$  degrees corresponds to quartz while the one at  $2\theta = 20.84$  degrees to feldspar (Figure S2). The diffraction peak (001) is observed in the region of small diffraction angles ( $2\theta = 4-9$  degrees). For montmorillonite in the nanocomposites, compared to natural montmorillonite ( $2\theta = 8.86$  degrees), no shift of the peak maximum (001) is observed (Figure S1).

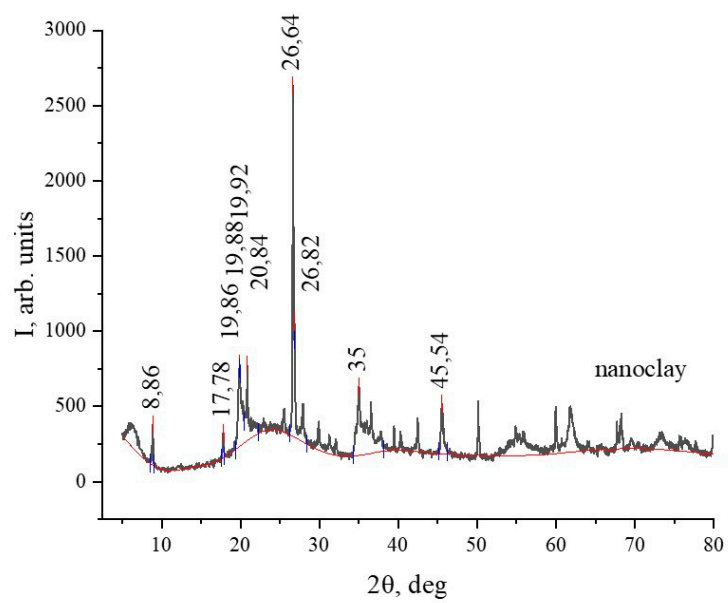

Figure S2. XRD patterns of the montmorillonite clay.

### FTIR spectra

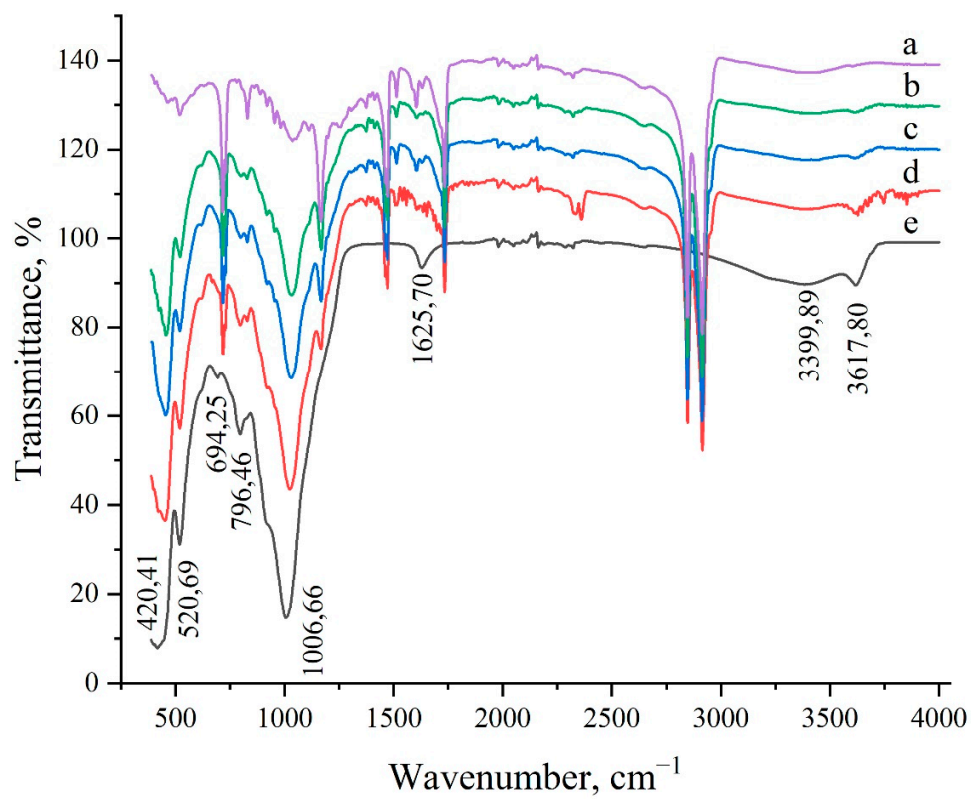

Figure S3. IR spectra of (a) pure wax, and its mixtures with the montmorillonite clay (w/w): (b) MCS<sub>70:30</sub>, (c) MCS<sub>60:40</sub>, (d) MCS<sub>50:50</sub>, and the pure montmorillonite clay (e).

## NMR spectra

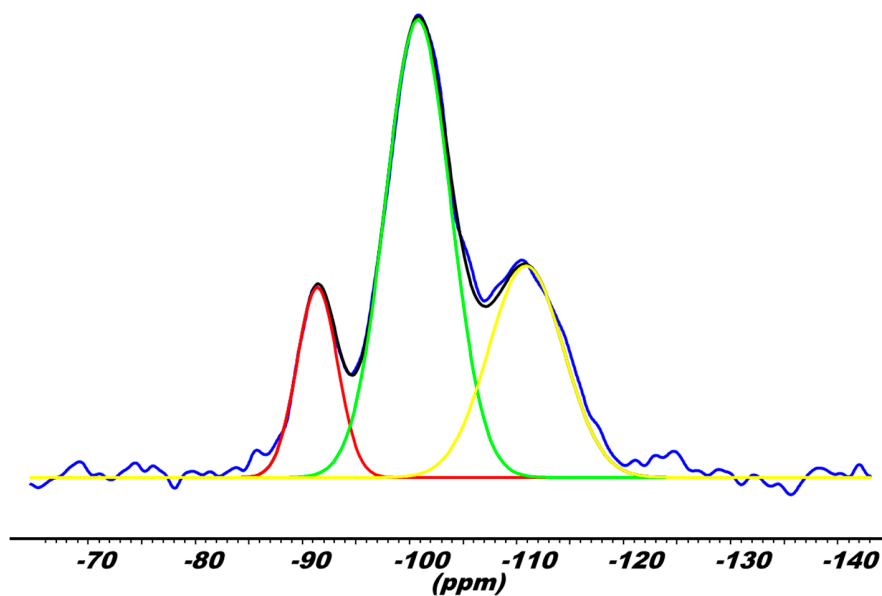

Figure S4. Deconvoluted  $^{29}\text{Si}$  CP NMR spectrum of the pure montmorillonite nanoclay with the derived parameters from the fit included in Table S1

Table S1. NMR parameter derived from the deconvoluted spectrum

| Peak position, ppm | Intensity, a.u. | FWHM, Hz | Gauss/Lorentz ratio | Integral, a.u. |
|--------------------|-----------------|----------|---------------------|----------------|
| -91.4348           | 119477032       | 354.00   | 1.0                 | 3.473982e+010  |
| -100.8384          | 288106432       | 567.63   | 1.0                 | 1.343254e+011  |
| -110.9246          | 133179568       | 654.69   | 1.0                 | 7.161651e+010  |

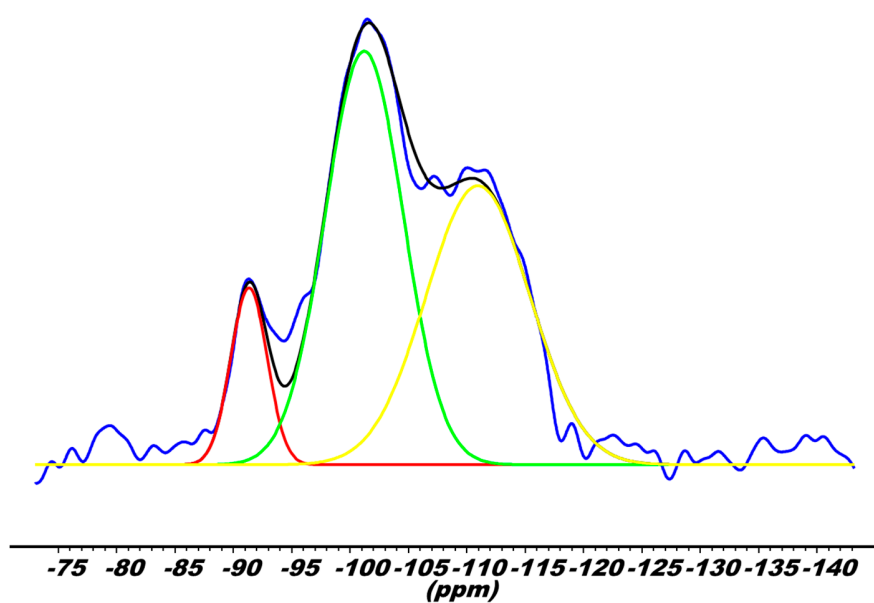

Figure S5. Deconvoluted  $^{29}\text{Si}$  CP NMR spectrum of the  $\text{MCS}_{50:50}$  sample with the derived parameters from the fit included in Table S2

Table S2. NMR parameter derived from the fit of the deconvoluted spectrum

| Peak position, ppm | Intensity, a.u. | FWHM, Hz | Gauss/Lorentz ratio | Integral, a.u. |
|--------------------|-----------------|----------|---------------------|----------------|
| -91.3387           | 129711464       | 290.66   | 1.0                 | 3.096731e+010  |
| -101.1943          | 301206176       | 625.61   | 1.0                 | 1.547774e+011  |
| -110.9422          | 203592992       | 833.13   | 1.0                 | 1.393206e+011  |

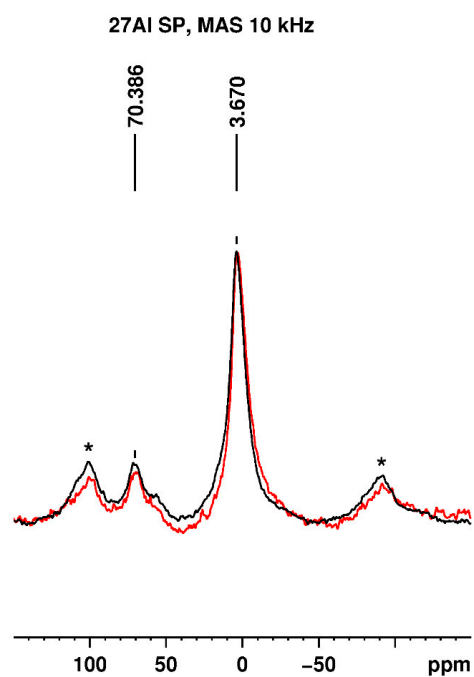

Figure S6  $^{27}\text{Al}$  single pulse (SP) excitation NMR spectra of montmorillonite (black) and  $\text{MCS}_{50:50}$  (red) recorded at 10 kHz MAS. The spectra are scaled to equal intensity. The asterisks denote spinning sidebands.

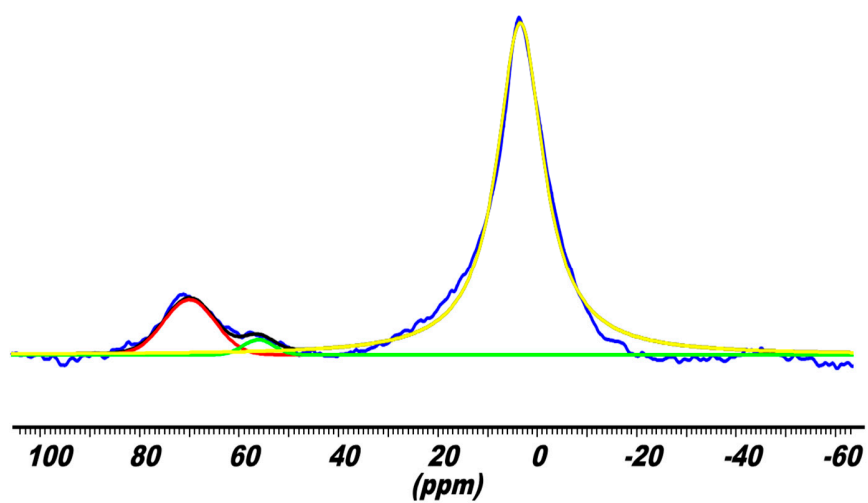

Figure S7. Deconvoluted  $^{27}\text{Al}$  SP NMR spectrum of montmorillonite with the derived parameters from the fit included in Table S3

Table S3. NMR parameter derived from the fit of the deconvoluted  $^{27}\text{Al}$  SP NMR spectrum

| Peak position, ppm | Intensity, a.u. | FWHM, Hz | Gauss/Lorentz ratio | Integral, a.u. |
|--------------------|-----------------|----------|---------------------|----------------|
| 69.9598            | 9011382         | 1261.89  | 1.0                 | 9.340127e+009  |
| 56.0585            | 2581234         | 748.55   | 1.0                 | 1.587041e+009  |
| 3.3853             | 54658712        | 1181.92  | 0.0                 | 6.650393e+010  |

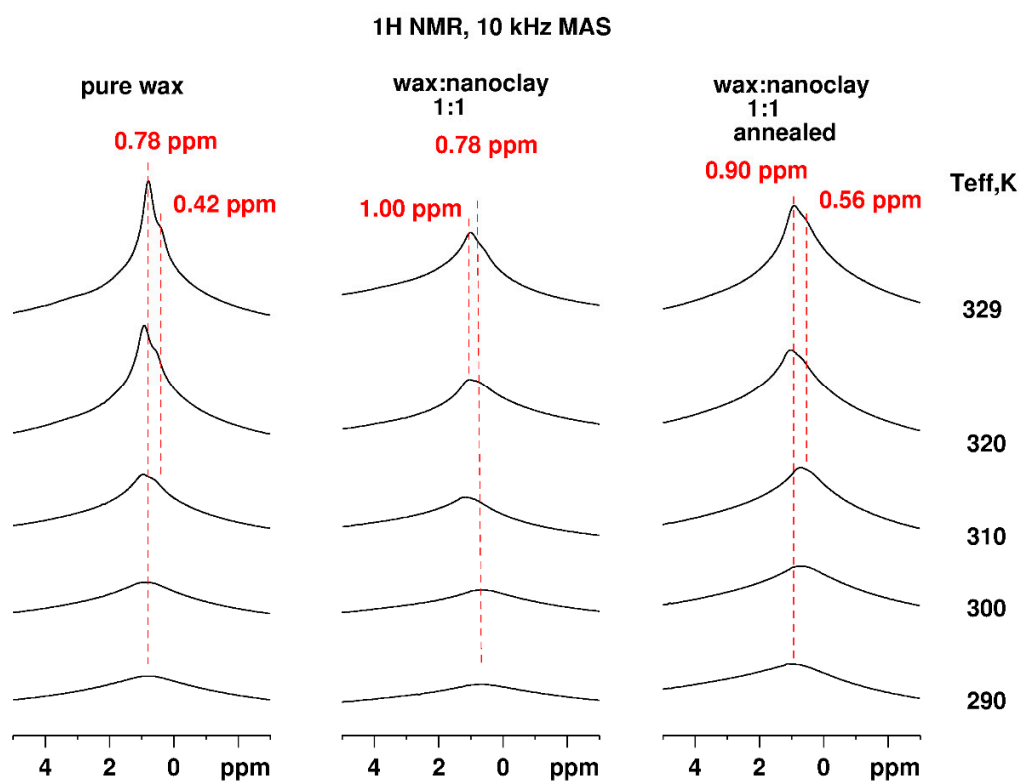

Figure S8. VT <sup>1</sup>H NMR spectra of the pure carnauba wax, the pristine MCS<sub>50:50</sub> and the annealed MCS<sub>50:50</sub> at 60°C at 290-329 K.

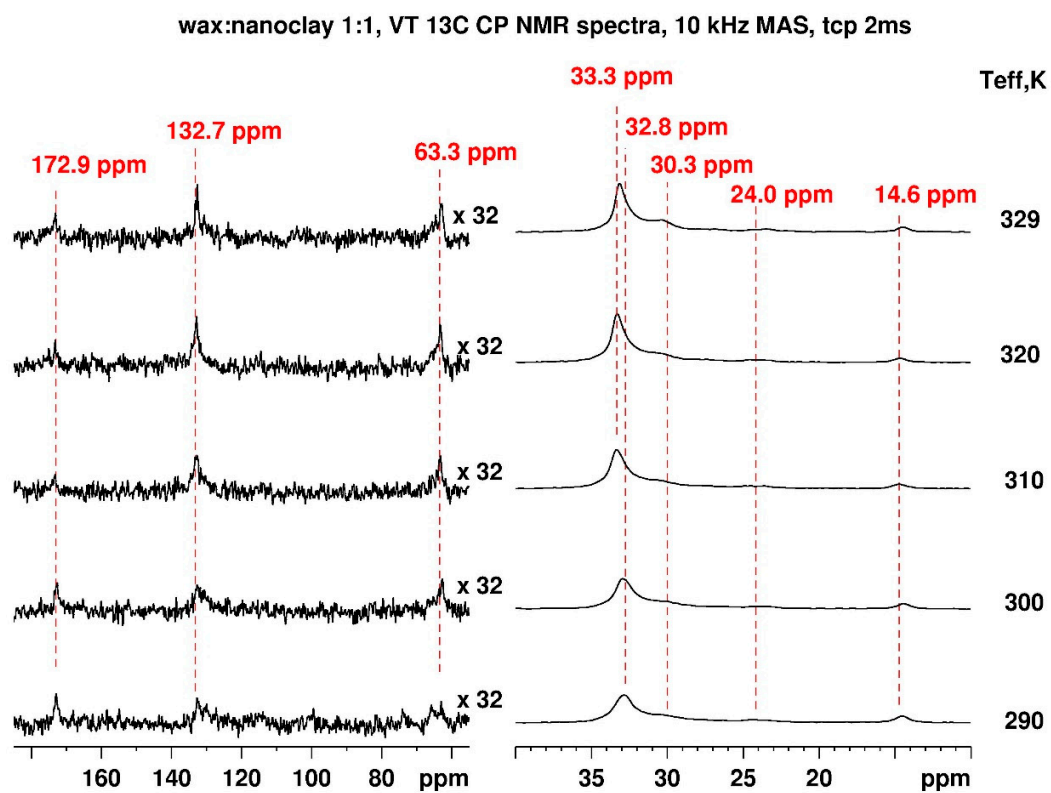

Figure S9. VT  $^{13}\text{C}$  CP NMR spectra of the pristine MCS<sub>50:50</sub> recorded at 10kHz MAS and contact time 2 ms under proton decoupling with the effective sample temperature presented on the right.

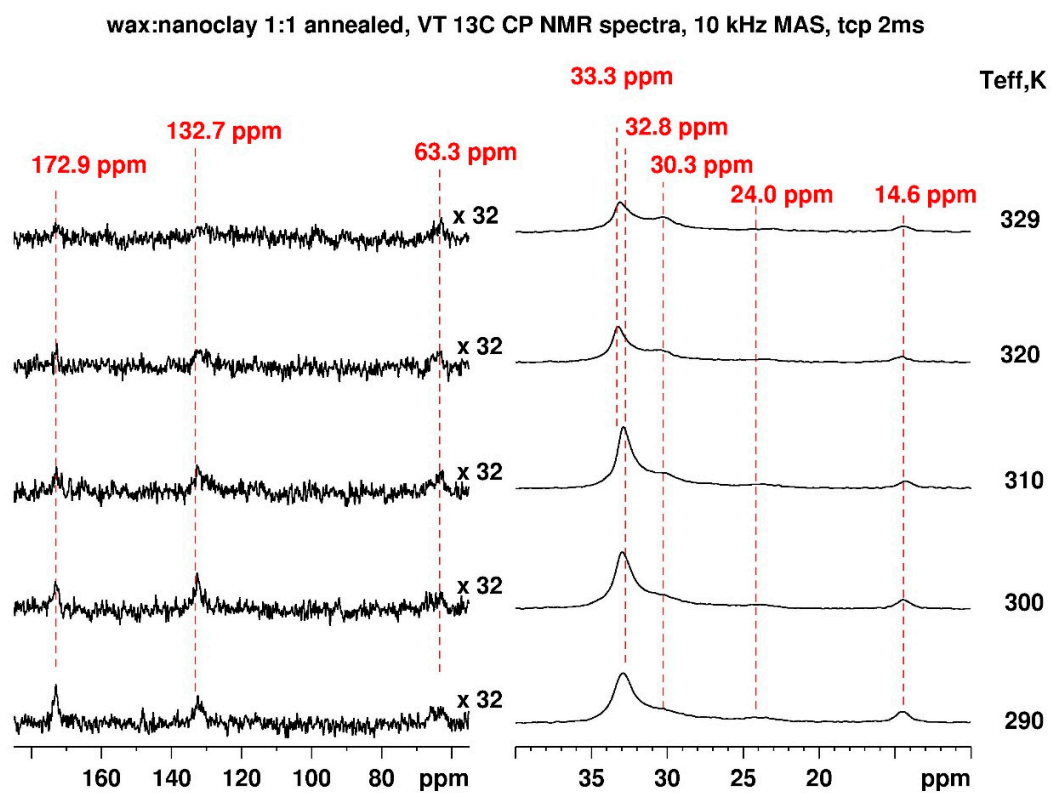

Figure S10. VT  $^{13}\text{C}$  CP NMR spectra of annealed MCS<sub>50:50</sub> recorded at 10kHz MAS and contact time 2 ms under proton decoupling with the effective sample temperature presented on the right.

## DSC thermograms

Tables with the characteristic values from DSC thermograms for the second melting of pure wax, MCS<sub>70:30</sub>, MCS<sub>60:40</sub>, MCS<sub>50:50</sub> and annealed MCS<sub>50:50</sub>

Table S4. Characteristic DSCs value extracted from the second melting of pure wax (Wax : Montmorillonite 100 : 0) from the thermograms S11 and S12

|         | Normalized Enthalpy, J/g | Onset, °C  | Peak temp., °C | Endset, °C |
|---------|--------------------------|------------|----------------|------------|
| 1       | 190.9                    | 69.8       | 82.3           | 85.7       |
| 2       | 189.3                    | 69.7       | 82.2           | 85.8       |
| average | 190.1 ± 0.8              | 69.8 ± 0.1 | 82.3 ± 0.1     | 85.8 ± 0.1 |

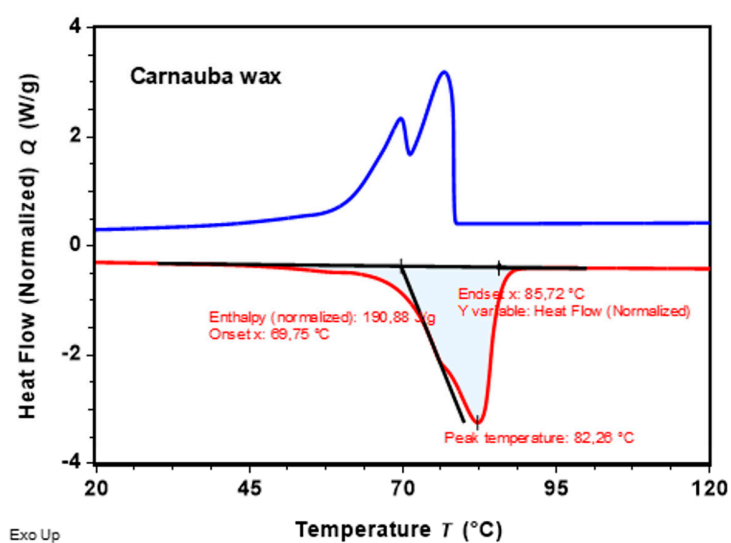

Figure S11. DSC thermogram of carnauba wax (first measurement)

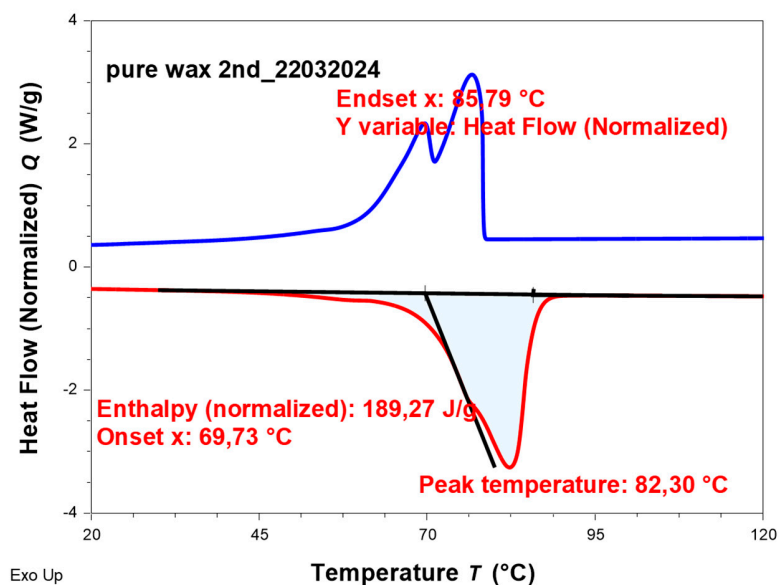

Figure S12. DSC thermogram of carnauba wax (second measurement)

Table S5. Characteristic DSCs value extracted from the second melting of MCS<sub>70:30</sub> (Wax : Montmorillonite 70 : 30) from the thermograms presented on Figures S13, S14 and S15

|         | Normalized Enthalpy, J/g | Onset, °C  | Peak temp., °C | Endset, °C |
|---------|--------------------------|------------|----------------|------------|
| 1       | 106.7                    | 73.6       | 82.6           | 85.0       |
| 2       | 107.3                    | 73.4       | 82.9           | 85.3       |
| 3       | 109.6                    | 73.2       | 83.0           | 85.6       |
| average | 107.9 ± 1.7              | 73.4 ± 0.2 | 82.8 ± 0.2     | 85.3 ± 0.3 |

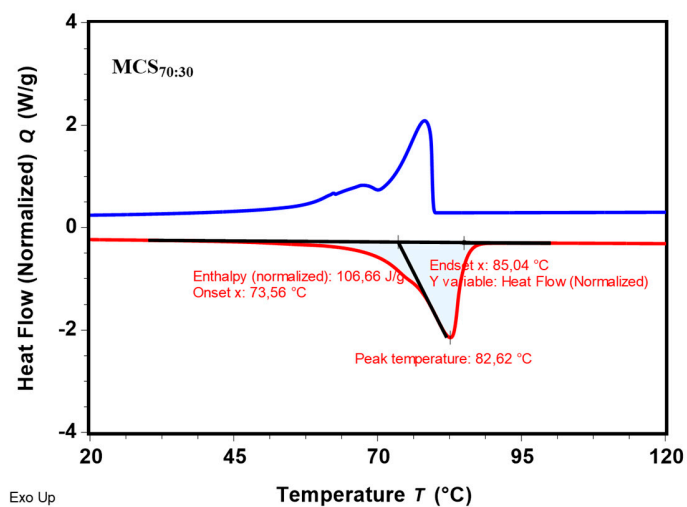

Figure S13. DSC thermogram of MCS<sub>70:30</sub> (first measurement)

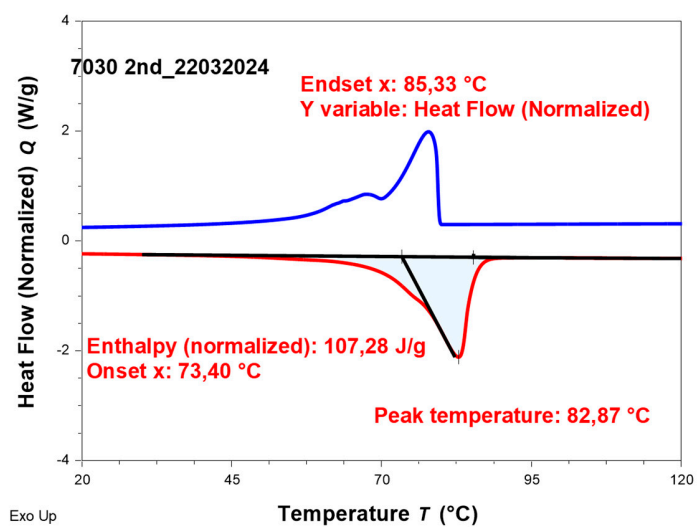

Figure S14. DSC thermogram of MCS<sub>70:30</sub> (second measurement)

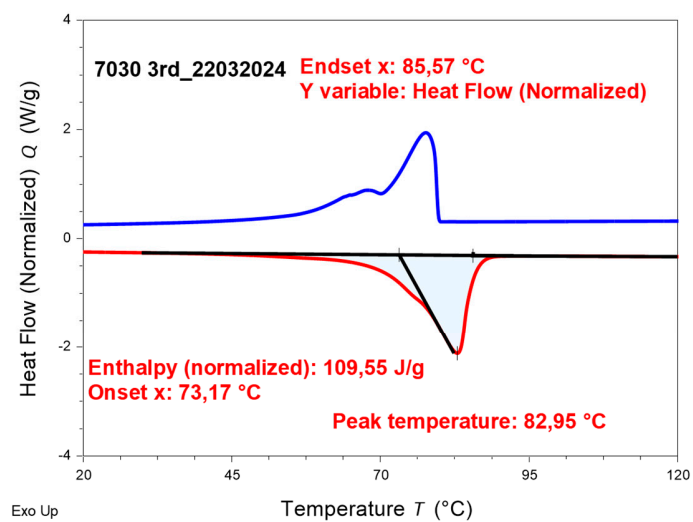

Figure S15. DSC thermogram of MCS<sub>70:30</sub> (third measurement)

Table S6. Characteristic DSCs value extracted from the second melting of MCS<sub>60:40</sub> (Wax : Montmorillonite 60 : 40) from the thermograms presented on Figures S16, S17 and S18

|         | Normalized Enthalpy, J/g | Onset, °C  | Peak temp., °C | Endset, °C |
|---------|--------------------------|------------|----------------|------------|
| 1       | 92.5                     | 74.6       | 82.9           | 85.2       |
| 2       | 95.7                     | 74.3       | 83.4           | 86.0       |
| 3       | 96.7                     | 74.2       | 83.3           | 85.9       |
| average | 95.0 ± 2.5               | 74.4 ± 0.2 | 83.2 ± 0.3     | 85.7 ± 0.5 |

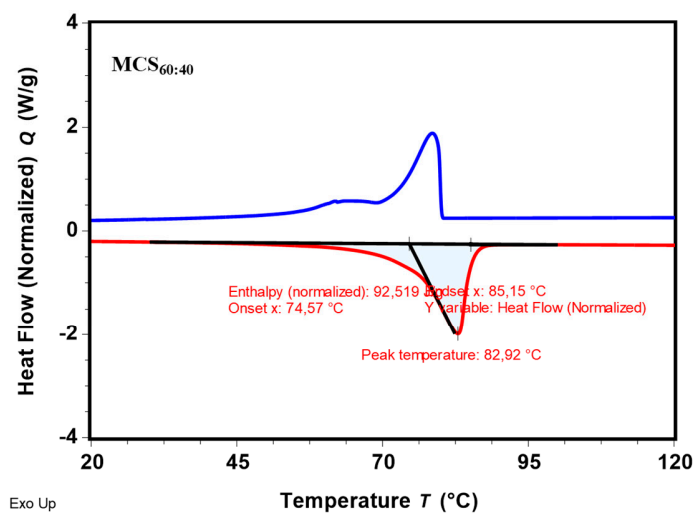

Figure S16. DSC thermogram of MCS<sub>60:40</sub> (first measurement)

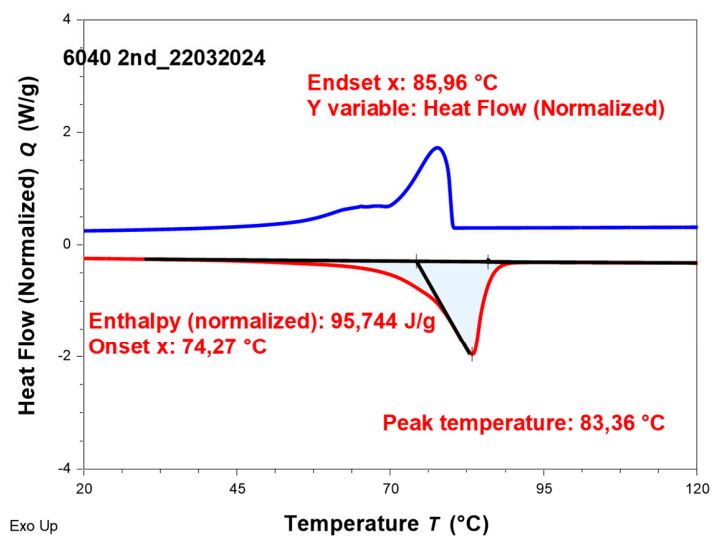

Figure S17. DSC thermogram of MCS<sub>60:40</sub> (second measurement)

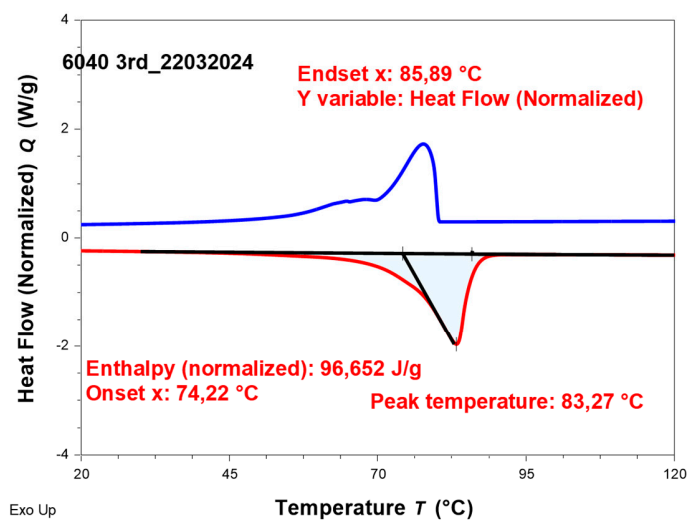

Figure S18. DSC thermogram of MCS<sub>60:40</sub> (third measurement)

Table S7. Characteristic DSCs value extracted from the second melting of MCS<sub>50:50</sub> (Wax : Montmorillonite 50 : 50) from the thermograms presented on Figures S19, S20 and S21

|         | Normalized Enthalpy, J/g | Onset, °C  | Peak temp., °C | Endset, °C |
|---------|--------------------------|------------|----------------|------------|
| 1       | 65.8                     | 76.5       | 83.8           | 86.5       |
| 2       | 71.7                     | 76.4       | 83.5           | 86.1       |
| 3       | 70.9                     | 76.4       | 83.5           | 85.9       |
| average | 69.5 ± 3.7               | 76.4 ± 0.1 | 83.6 ± 0.2     | 86.2 ± 0.3 |

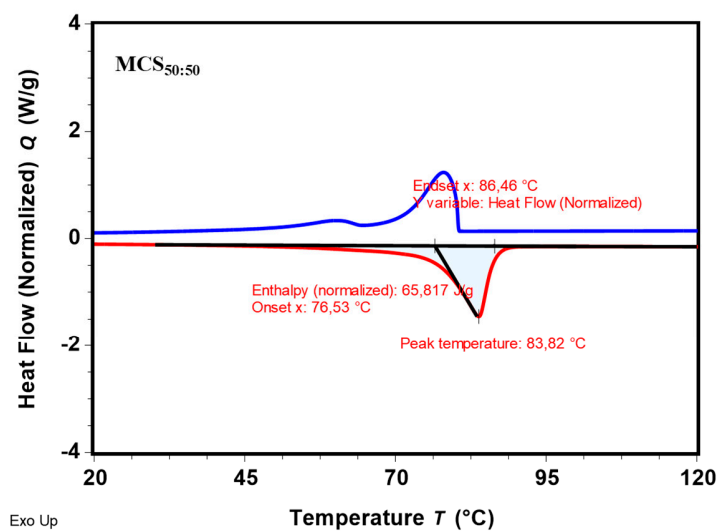

Figure S19. DSC thermogram of MCS<sub>50:50</sub> (first measurement)

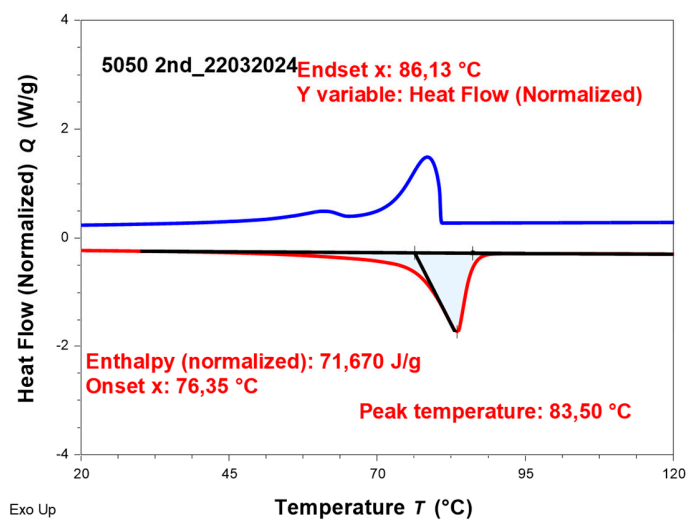

Figure S20. DSC thermogram of MCS<sub>50:50</sub> (second measurement)

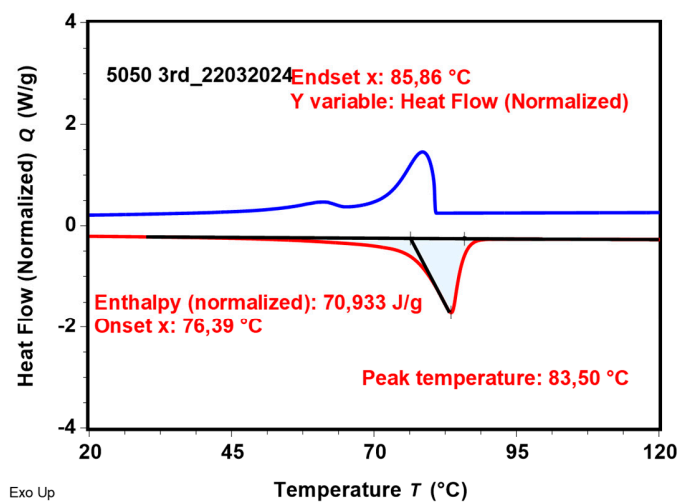

Figure S21. DSC thermogram of MCS<sub>50:50</sub> (third measurement)

Table S8. Characteristic DSCs value extracted from the second melting of annealed MCS<sub>50:50</sub> (Wax : Montmorillonite 50 : 50) from the thermograms presented on Figures S22, S23 and S24

|         | Normalized Enthalpy, J/g | Onset, °C      | Peak temp., °C | Endset, °C     |
|---------|--------------------------|----------------|----------------|----------------|
| 1       | 109.4                    | 75.3           | 83.2           | 86.8           |
| 2       | 74.6                     | 76.8           | 84.1           | 87.8           |
| 3       | 69.4                     | 77.1           | 84.2           | 87.2           |
| average | $84.5 \pm 24.9$          | $76.4 \pm 1.1$ | $83.8 \pm 0.6$ | $87.3 \pm 0.5$ |

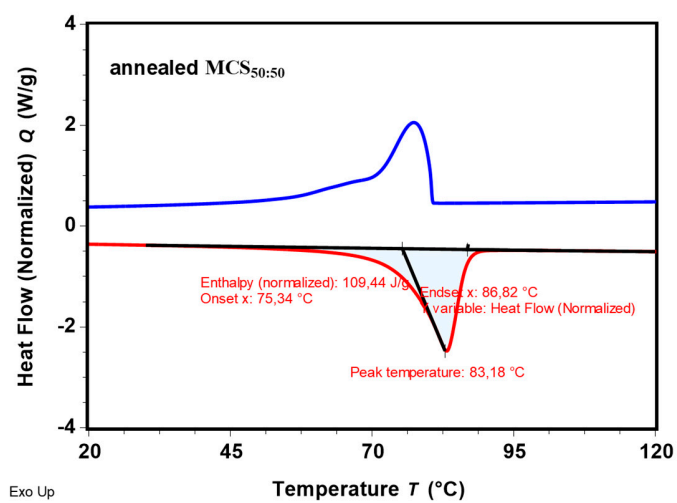

Figure S22. DSC thermogram of annealed MCS<sub>50:50</sub> (first measurement)

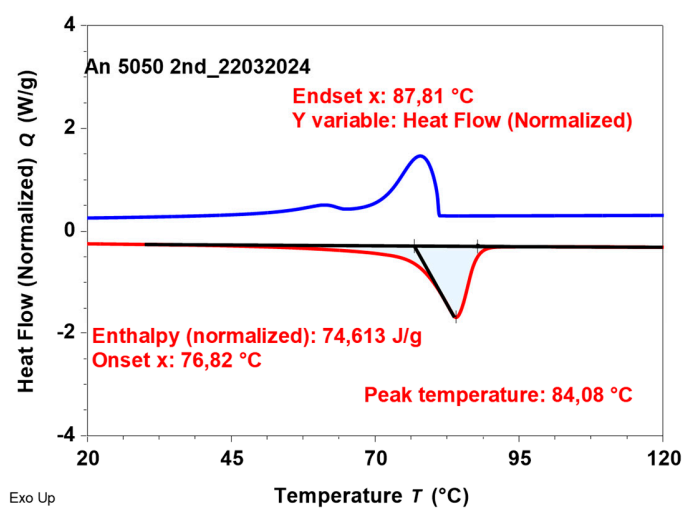

Figure S23. DSC thermogram of annealed MCS<sub>50:50</sub> (second measurement)

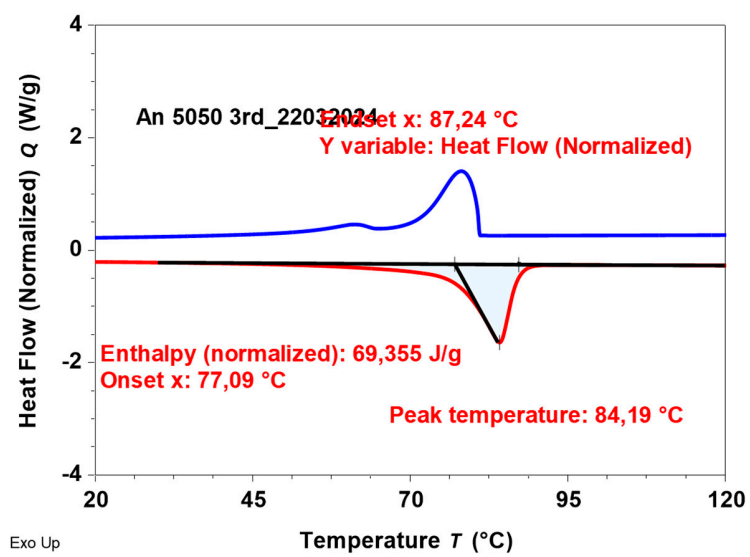

Figure S24. DSC thermogram of annealed MCS<sub>50:50</sub> (third measurement)
